# Supplementary material for: CO2 capture, storage, and conversion using a praseodymium-modified Ga2O3 photocatalyst
Source: Royal Society of Chemistry journal article supplement (doi:10.1039/c7ta04918h), 2017-01-01
Supplement: c7ta04918h1.pdf [file c7ta04918h1.pdf]

# **CO<sub>2</sub> capture, storage, and conversion using a praseodymium-modified Ga<sub>2</sub>O<sub>3</sub> photocatalyst**

Zeai Huang,<sup>a</sup> Kentaro Teramura,<sup>a,b\*</sup> Hiroyuki Asakura,<sup>a,b</sup> Saburo Hosokawa,<sup>a,b</sup> Tsunehiro  
Tanaka<sup>a,b\*</sup>

<sup>a</sup>Department of Molecular Engineering, Graduate School of Engineering, Kyoto University,  
Kyotodaigaku Katsura, Nishikyo-ku, Kyoto 615-8510, Japan

<sup>b</sup>Elements Strategy Initiative for Catalysts & Batteries (ESICB), Kyoto University, 1-30  
Goryo-Ohara, Nishikyo-ku, Kyoto 615-8245, Japan

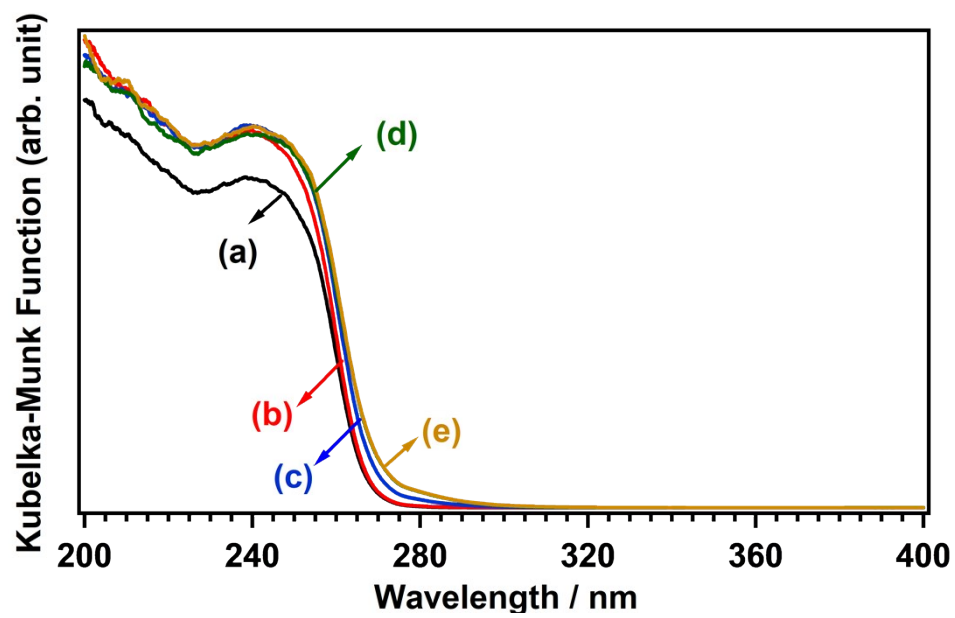

**Fig. S1** UV-Vis diffuse reflectance spectra of Pr/Ga<sub>2</sub>O<sub>3</sub> with different amounts of Pr: (a) 0 mol%; (b) 1.0 mol%; (c) 3.0 mol%; (d) 5.0 mol%; and (e) 10.0 mol%.

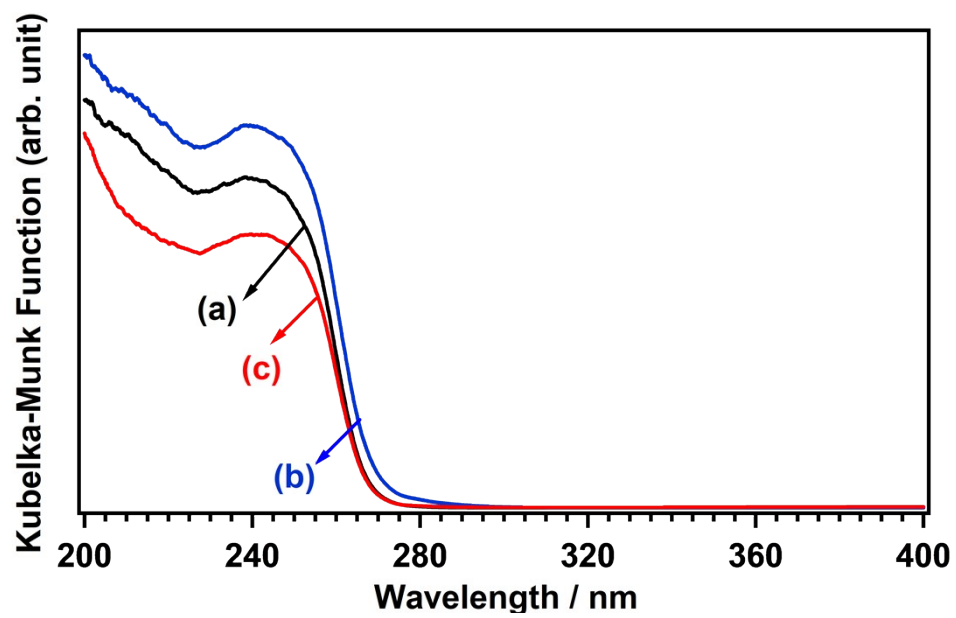

**Fig. S2** UV-Vis diffuse reflectance spectra of (a) bare Ga<sub>2</sub>O<sub>3</sub> and 3.0 Pr/Ga<sub>2</sub>O<sub>3</sub> (b) before and (c) after reaction.

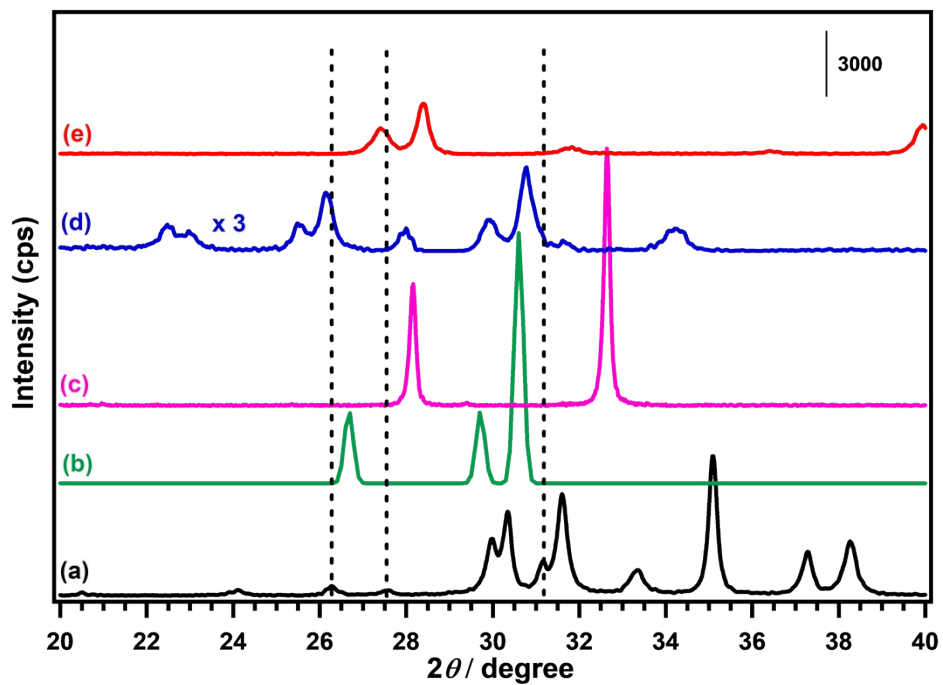

**Fig. S3** XRD patterns of (a) 3.0 Pr/Ga<sub>2</sub>O<sub>3</sub>, (b) Pr<sub>2</sub>O<sub>3</sub>, (c) Pr<sub>6</sub>O<sub>11</sub>, (d) Pr<sub>2</sub>O<sub>2</sub>CO<sub>3</sub>, and (e) Pr(OH)<sub>3</sub>.

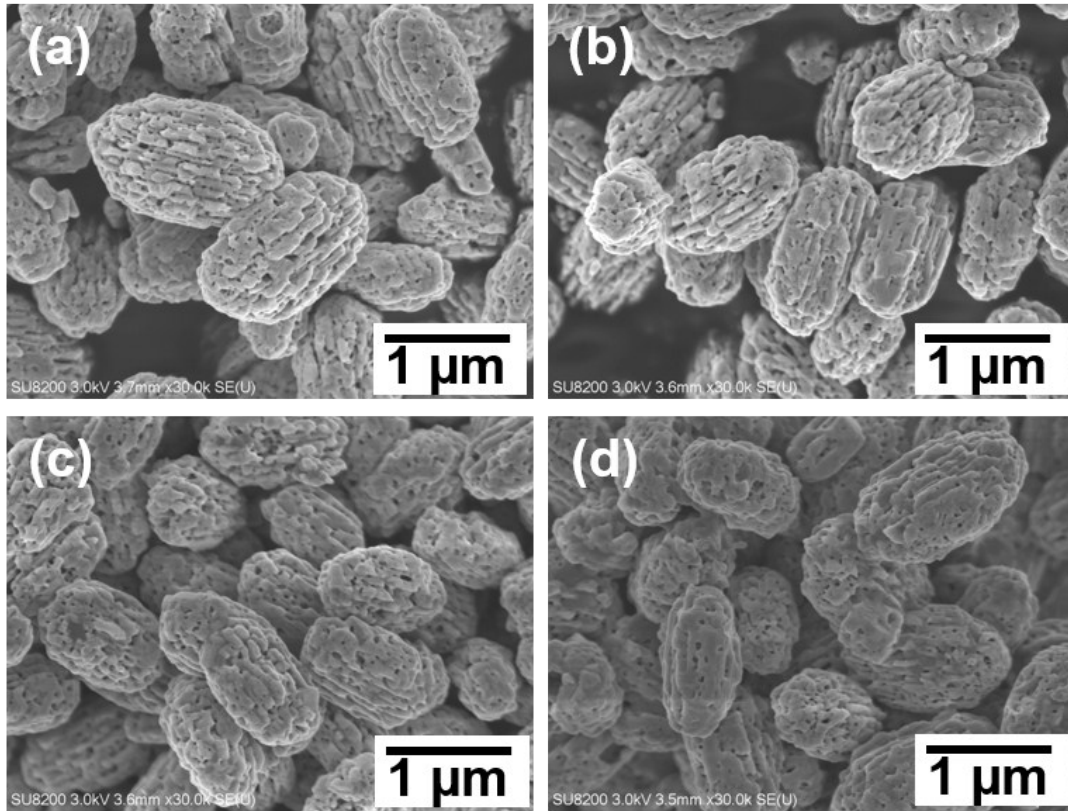

**Fig. S4** SEM images of  $\text{Ga}_2\text{O}_3$  with different degrees of Pr modification: (a) 0 mol%; (b) 1.0 mol%; (c) 5.0 mol%; and (d) 10.0 mol%.

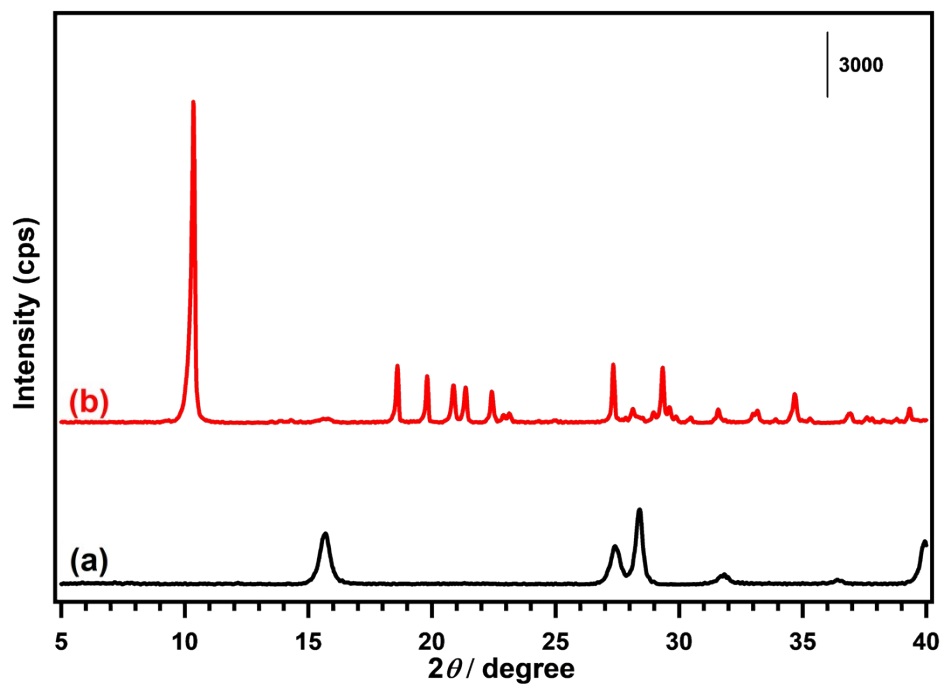

**Fig. S5** XRD patterns of (a) as-prepared  $\text{Pr(OH)}_3$ , (b) treated in  $0.1 \text{ M NaHCO}_3$  with flowing  $\text{CO}_2$  for 20 h.

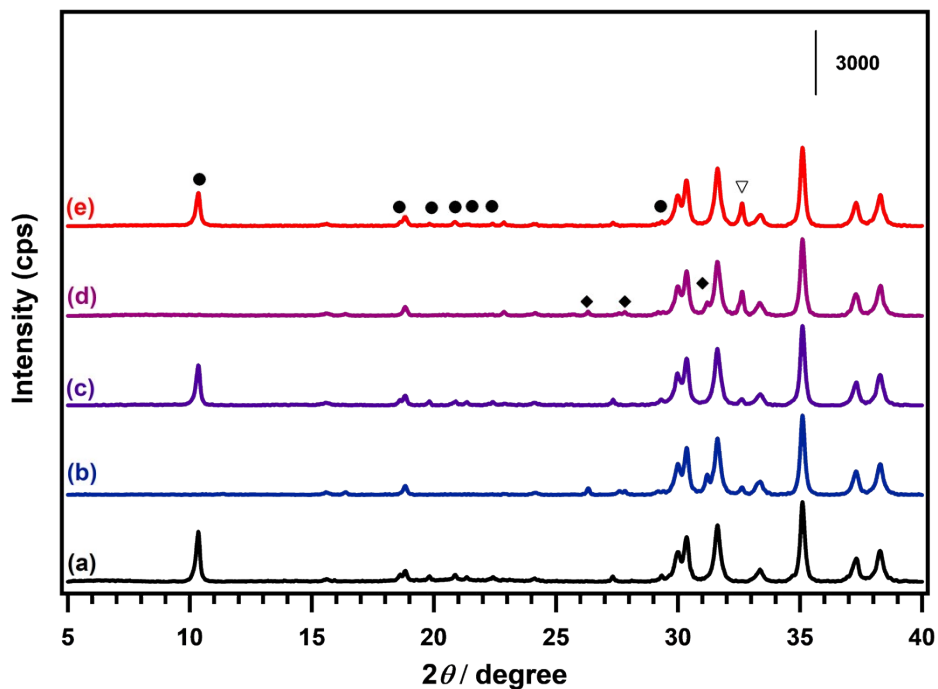

**Fig. S6** XRD patterns of 3.0 Pr/Ga<sub>2</sub>O<sub>3</sub> (a) after reaction, (b) after calcination of sample (a) at 1223 K for 1 h, (c) after treatment of sample (b) in an aqueous solution of NaHCO<sub>3</sub> under CO<sub>2</sub> flow for 5 h, (d) after calcination of sample (c) at 1223 K for 1 h, and (e) after treatment of sample (d) in an aqueous solution of under CO<sub>2</sub> flow for 5 h. Closed circle: Pr<sub>2</sub>(CO<sub>3</sub>)<sub>3</sub>·8H<sub>2</sub>O. Closed diamond: Pr-derived species. Open triangle: PrGaO<sub>3</sub>.

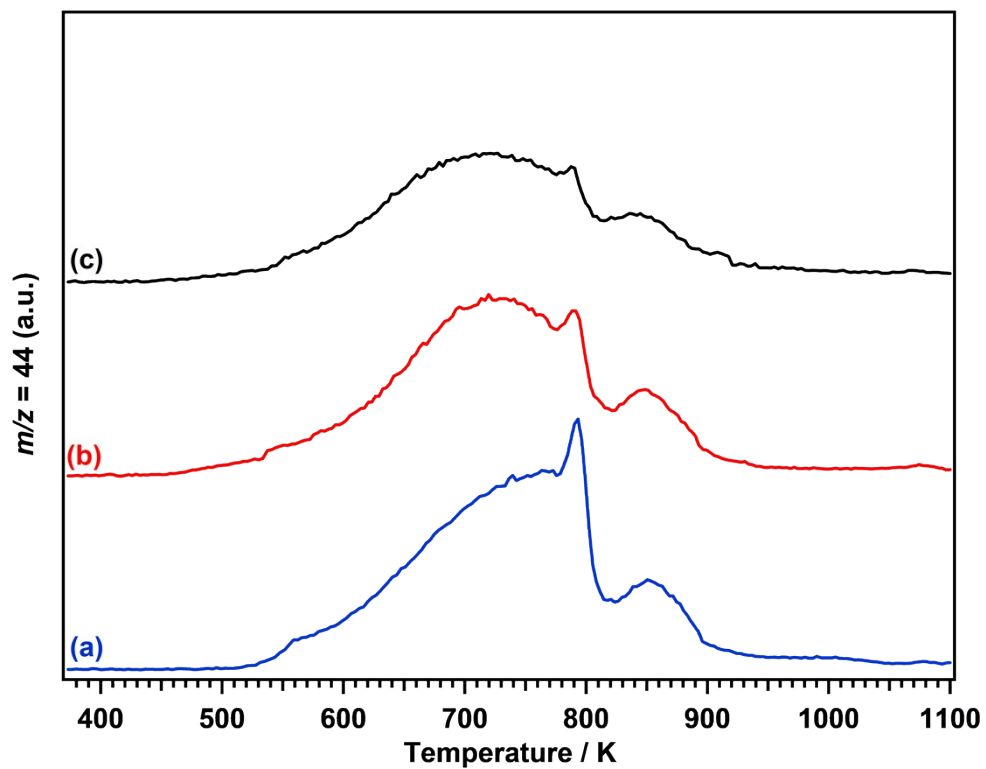

**Fig. S7** CO<sub>2</sub>-TPD profiles ( $m/z = 44$ ) of 3.0 Pr/Ga<sub>2</sub>O<sub>3</sub> (a) after reaction (the first run), (b) the second run, and (c) the third run after calcination at 1223 K for 1 h and treatment in an aqueous solution of NaHCO<sub>3</sub> under CO<sub>2</sub> flow.



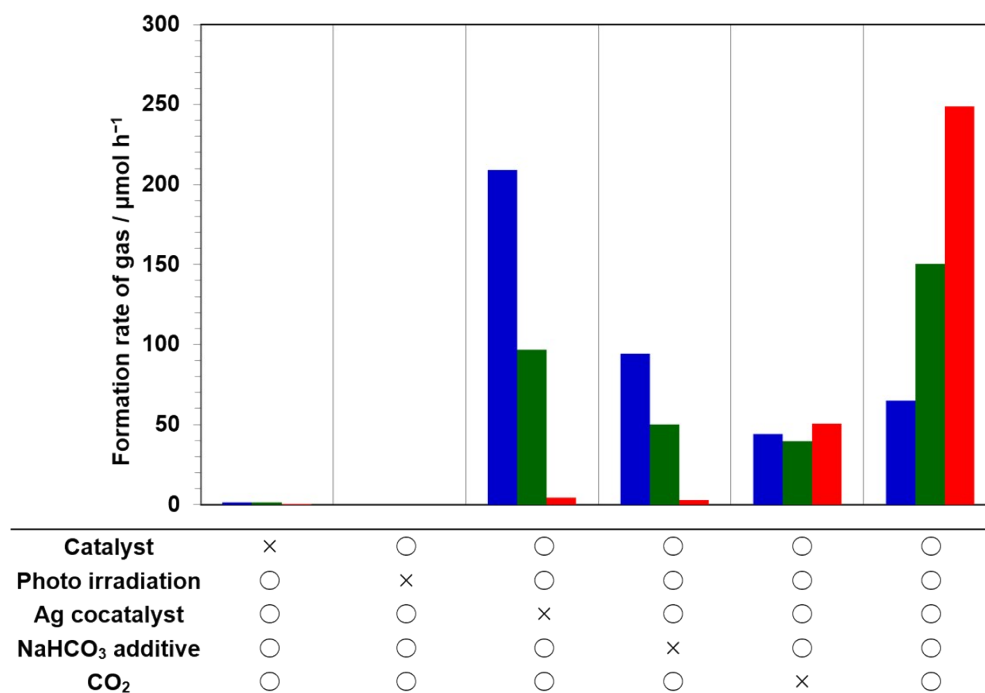

**Fig. S8** Formation rates of H<sub>2</sub> (blue), O<sub>2</sub> (green), and CO (red) in the absence of each component in the photocatalytic conversion of CO<sub>2</sub> by H<sub>2</sub>O over Ag/3.0 Pr/Ga<sub>2</sub>O<sub>3</sub>. Photocatalyst weight: 0.5 g, CO<sub>2</sub> flow: 30 mL min<sup>-1</sup>, solution volume: 1.0 L, additive: 0.1 M NaHCO<sub>3</sub>, light source: 400 W Hg lamp.

We performed blank tests for the photocatalytic conversion of CO<sub>2</sub> by H<sub>2</sub>O over Ag/3.0 mol% Pr/Ga<sub>2</sub>O<sub>3</sub> with the omission of one of five system components; the photocatalyst, photoirradiation, CO<sub>2</sub> flow, the Ag cocatalyst, and the NaHCO<sub>3</sub> additive, to confirm that these components are important for high CO evolution in our system (Figure S4). Tiny amounts of H<sub>2</sub> and O<sub>2</sub> are evolved without the photocatalyst. No product is obtained in the

absence of photoirradiation. Without the Ag cocatalyst, H<sub>2</sub> is evolved as the main product. It is known that the electrochemical reduction of CO<sub>2</sub> to CO occurs selectively on a Ag metal electrode in aqueous solution. Similarly, the metallic Ag particles on the 3.0 Pr/Ga<sub>2</sub>O<sub>3</sub> function as active sites to capture the photoexcited electrons for the reduction of CO<sub>2</sub>. Without NaHCO<sub>3</sub>, mainly H<sub>2</sub> is evolved. The positive effects of various additives including NaHCO<sub>3</sub> have been reported in our recent work.<sup>1</sup> One function of NaHCO<sub>3</sub> is to increase the solubility of CO<sub>2</sub> in water. Here, NaHCO<sub>3</sub> does not accelerate the rate of H<sub>2</sub> formation but rather that of CO. In addition, the Pr species on the surface of Ga<sub>2</sub>O<sub>3</sub> are not stable without NaHCO<sub>3</sub> (Figure 5(b)). Thus, the function of NaHCO<sub>3</sub> is also beneficial for maintaining the Pr species. Interestingly, the formation of CO was achieved at 50.4 μmol h<sup>-1</sup> with a selectivity of 53.3% toward CO, and this result is totally different to those of previously reported catalysts such as Zn/Ga<sub>2</sub>O<sub>3</sub>,<sup>2</sup> Sr<sub>2</sub>KTa<sub>5</sub>O<sub>15</sub>,<sup>3</sup> and ZnTa<sub>2</sub>O<sub>6</sub>.<sup>4</sup> This can be explained as follows: NaHCO<sub>3</sub> can decompose to form CO<sub>2</sub> under flowing Ar, and the CO<sub>2</sub> is easily captured by Pr species on the surface of Ga<sub>2</sub>O<sub>3</sub>, which are then used for the formation of CO during photoirradiation. However, the other catalysts reported do not have a strong ability for CO<sub>2</sub> capture, thus they do not form CO without flowing CO<sub>2</sub>.

## References

1. K. Teramura, K. Hori, Y. Terao, Z. Huang, S. Iguchi, Z. Wang, H. Asakura, S. Hosokawa and T. Tanaka, *The Journal of Physical Chemistry C*, 2017, **121**, 8711-8721.

2. K. Teramura, Z. Wang, S. Hosokawa, Y. Sakata and T. Tanaka, *Chemistry-A European Journal*, 2014, **20**, 9906-9909.
3. Z. Huang, K. Teramura, S. Hosokawa and T. Tanaka, *Applied Catalysis B: Environmental*, 2016, **199**, 272-281.
4. S. Iguchi, K. Teramura, S. Hosokawa and T. Tanaka, *Catalysis Science & Technology*, 2016, **6**, 4978-4985.
